# Supplementary material for: Clove essential oil emulsions-loaded arrowroot starch-beeswax-based edible coating extends the shelf life and preserves the postharvest quality of fresh tomatoes (Solanum lycopersicum L.) stored at room temperature
Source: Royal Society of Chemistry journal article supplement (doi:10.1039/d4fb00033a), 2024-01-01
Supplement: d4fb00033a1.pdf [file d4fb00033a1.pdf]

Clove Essential Oil Emulsions Loaded Arrowroot Starch-Beeswax Based Edible Coating Extends the Shelf Life and Preserves the Postharvest Quality of Fresh Tomatoes (*Solanum lycopersicum* L.) Stored at Room Temperature

Nimesh Dileesha Lakshan <sup>a</sup>, Chathuri M. Senanayake <sup>a\*</sup>, Thushari Liyanage <sup>b</sup>, and Ahinsa Lankanayaka <sup>a</sup>

<sup>a</sup> Department of Biosystems Technology, Faculty of Technology, University of Sri Jayewardenepura, Homagama 10200, Sri Lanka

<sup>b</sup> Central Research Station, Department of Export Agriculture, Matale 21000, Sri Lanka

\*Corresponding author: [chathurisnkn@sjp.ac.lk](mailto:chathurisnkn@sjp.ac.lk)

**Table S1** Effect of edible coatings on the luminosity ( $L^*$ ) of tomatoes during storage <sup>a</sup>

| Formulation<br>n | Luminosity ( $L^*$ )           |                                  |                               |                                |                                 |                                 |                                 |                                  |                                |                                  |                                     |                                |                                 |
|------------------|--------------------------------|----------------------------------|-------------------------------|--------------------------------|---------------------------------|---------------------------------|---------------------------------|----------------------------------|--------------------------------|----------------------------------|-------------------------------------|--------------------------------|---------------------------------|
|                  | Number of Storage Days         |                                  |                               |                                |                                 |                                 |                                 |                                  |                                |                                  |                                     |                                |                                 |
|                  | 0                              | 4                                | 8                             | 12                             | 16                              | 20                              | 24                              | 28                               | 32                             | 36                               | 40                                  | 44                             | 48                              |
| Control          | 47.37±2.15 <sup>aA</sup>       | 43.77±1.97 <sup>cAB</sup>        | 38.70±3.05 <sup>bb</sup>      | 38.37±1.95 <sup>cB</sup>       | 39.73±3.76 <sup>bB</sup>        | 38.40±6.24 <sup>aB</sup>        | n.d.                            | n.d.                             | n.d.                           | n.d.                             | n.d.                                | n.d.                           | n.d.                            |
| 1                | 49.27±0.12 <sup>aA</sup>       | 48.70±4.87 <sup>abA</sup>        | 48.83±3.07 <sup>aA</sup>      | 47.83±5.95 <sup>abA</sup><br>B | 44.70±3.08 <sup>abABC</sup>     | 45.47±3.62 <sup>aABC</sup>      | 44.70±2.57 <sup>aABC</sup>      | 45.90±3.12 <sup>aABC</sup>       | 47.00±5.27 <sup>aAB</sup><br>C | 45.73±1.00 <sup>aABC</sup>       | 43.13±1.72 <sup>deABC</sup>         | 42.00±1.47 <sup>dBC</sup>      | 40.70±1.05 <sup>cC</sup>        |
| 2                | 48.33±1.38 <sup>aAB</sup>      | 50.27±1.01 <sup>abA</sup>        | 50.27±2.50 <sup>aA</sup>      | 44.60±2.00 <sup>bBC</sup>      | 45.90±4.62 <sup>aABC</sup>      | 46.17±2.48 <sup>aABC</sup>      | 46.77±4.11 <sup>aABC</sup>      | 45.80±4.37 <sup>aABC</sup>       | 43.97±2.84 <sup>aBC</sup>      | 43.00±2.78 <sup>aBC</sup>        | 44.53±2.20 <sup>cdeBC</sup>         | 41.87±1.17 <sup>dC</sup>       | 45.60±2.65 <sup>abABC</sup>     |
| 3                | 49.60±1.71 <sup>aAB</sup><br>C | 52.07±2.35 <sup>aA</sup>         | 51.97±2.01 <sup>aA</sup>      | 50.50±3.22 <sup>abA</sup><br>B | 48.67±5.20 <sup>aABC</sup>      | 48.23±5.86 <sup>aABC</sup>      | 47.20±3.01 <sup>aABC</sup>      | 47.90±3.03 <sup>aABC</sup>       | 48.50±2.26 <sup>aAB</sup><br>C | 46.00±3.40 <sup>aABC</sup>       | 45.43±1.76 <sup>bcdBC</sup>         | 49.40±2.00 <sup>aAB</sup><br>C | 44.13±0.67 <sup>bC</sup>        |
| 4                | 49.23±1.17 <sup>aAB</sup><br>C | 48.97±0.40 <sup>abABC</sup><br>D | 49.93±1.12 <sup>aA</sup><br>B | 50.30±1.91 <sup>abA</sup>      | 47.03±0.58 <sup>aCDEF</sup>     | 47.23±1.50 <sup>aBCD</sup><br>E | 46.33±1.70 <sup>aDEF</sup><br>G | 46.47±2.64 <sup>aCDEF</sup><br>G | 45.60±1.39 <sup>aEFG</sup>     | 47.73±1.77 <sup>aABCD</sup><br>E | 46.50±0.98 <sup>abcdCDEF</sup><br>G | 44.27±1.45 <sup>edFG</sup>     | 43.90±1.10 <sup>bG</sup>        |
| 5                | 48.43±1.74 <sup>aAB</sup>      | 50.63±0.76 <sup>abA</sup>        | 48.70±3.84 <sup>aA</sup><br>B | 51.70±2.10 <sup>aA</sup>       | 44.97±0.93 <sup>abBC</sup>      | 43.30±1.57 <sup>aC</sup>        | 45.53±0.50 <sup>aBC</sup>       | 44.90±1.93 <sup>aBC</sup>        | 44.17±4.74 <sup>aC</sup>       | 43.23±1.06 <sup>aC</sup>         | 48.43±0.65 <sup>abAB</sup>          | 48.47±0.90 <sup>abAB</sup>     | 45.47±1.72 <sup>abBC</sup>      |
| 6                | 49.33±1.53 <sup>aAB</sup><br>C | 50.50±1.48 <sup>abAB</sup>       | 50.43±0.90 <sup>aA</sup><br>B | 50.90±3.37 <sup>aA</sup>       | 47.67±2.95 <sup>aABC</sup><br>D | 46.67±3.20 <sup>aBCD</sup>      | 46.23±1.40 <sup>aCD</sup>       | 47.17±0.50 <sup>aABCD</sup>      | 45.57±2.86 <sup>aCD</sup>      | 45.77±1.33 <sup>aCD</sup>        | 49.53±1.44 <sup>aABC</sup>          | 45.30±0.87 <sup>cD</sup>       | 47.33±1.97 <sup>aABC</sup><br>D |
| 7                | 46.83±0.91 <sup>aAB</sup>      | 51.17±1.55 <sup>abA</sup>        | 50.03±2.66 <sup>aA</sup><br>B | 49.07±4.50 <sup>abA</sup><br>B | 49.57±2.41 <sup>aAB</sup>       | 48.77±5.52 <sup>aAB</sup>       | 47.50±3.47 <sup>aAB</sup>       | 46.57±4.13 <sup>aAB</sup>        | 46.53±3.55 <sup>aAB</sup>      | 45.33±0.64 <sup>aB</sup>         | 45.03±1.23 <sup>cdeB</sup>          | 46.53±1.31 <sup>bcAB</sup>     | 44.87±1.19 <sup>abB</sup>       |
| 8                | 49.37±2.62 <sup>aAB</sup><br>C | 47.97±0.67 <sup>bABC</sup>       | 52.37±1.48 <sup>aA</sup>      | 51.60±2.21 <sup>aAB</sup>      | 46.97±3.76 <sup>aBC</sup>       | 46.33±3.76 <sup>aCD</sup>       | 46.50±4.20 <sup>aCD</sup>       | 45.20±2.03 <sup>aCD</sup>        | 46.60±3.70 <sup>aCD</sup>      | 44.80±1.66 <sup>aCD</sup>        | 41.77±0.98 <sup>eD</sup>            | 45.73±2.48 <sup>bcCD</sup>     | 44.30±0.10 <sup>bCD</sup>       |
| 9                | 49.10±0.75 <sup>aAB</sup><br>C | 51.20±0.87 <sup>abAB</sup>       | 51.87±0.47 <sup>aA</sup>      | 51.43±1.07 <sup>aA</sup>       | 49.73±0.64 <sup>aABC</sup>      | 49.47±1.79 <sup>aABC</sup>      | 49.20±2.95 <sup>aABC</sup>      | 48.63±2.40 <sup>aABC</sup>       | 48.83±2.32 <sup>aAB</sup><br>C | 48.17±3.78 <sup>aABC</sup>       | 47.37±3.46 <sup>abcBC</sup>         | 46.97±1.45 <sup>abcC</sup>     | 46.17±0.68 <sup>abC</sup>       |

<sup>a</sup> Values that do not bear the same lowercase letter(s) within a column and the same uppercase letter(s) within a row are significantly different ( $p < 0.05$ ). 1 (10 g L<sup>-1</sup> AS, 0 mL L<sup>-1</sup> EO, 5 g L<sup>-1</sup> BW), 2 (10 g L<sup>-1</sup> AS, 2.5 mL L<sup>-1</sup> EO, 5 g L<sup>-1</sup> BW), 3 (10 g L<sup>-1</sup> AS, 5 mL L<sup>-1</sup> EO, 5 g L<sup>-1</sup> BW), 4 (15 g L<sup>-1</sup> AS, 0 mL L<sup>-1</sup> EO, 5 g L<sup>-1</sup> BW), 5 (15 g L<sup>-1</sup> AS, 2.5 mL L<sup>-1</sup> EO, 5 g L<sup>-1</sup> BW), 6 (15 g L<sup>-1</sup> AS, 5 mL L<sup>-1</sup> EO, 5 g L<sup>-1</sup> BW), 7 (20 g L<sup>-1</sup> AS, 0 mL L<sup>-1</sup> EO, 5 g L<sup>-1</sup> BW), 8 (20 g L<sup>-1</sup> AS, 2.5 mL L<sup>-1</sup> EO, 5 g L<sup>-1</sup> BW), 9 (20 g L<sup>-1</sup> AS, 5 mL L<sup>-1</sup> EO, 5 g L<sup>-1</sup> BW); n.d., not determined.

**Table S2** Effect of edible coatings on the red intensity ( $a^*$ ) of tomatoes during storage <sup>a</sup>

| Formulation | Red intensity ( $a^*$ )  |                           |                           |                           |                            |                            |                            |                            |                            |                            |                           |                             |                            |
|-------------|--------------------------|---------------------------|---------------------------|---------------------------|----------------------------|----------------------------|----------------------------|----------------------------|----------------------------|----------------------------|---------------------------|-----------------------------|----------------------------|
|             | Number of Storage Days   |                           |                           |                           |                            |                            |                            |                            |                            |                            |                           |                             |                            |
|             | 0                        | 4                         | 8                         | 12                        | 16                         | 20                         | 24                         | 28                         | 32                         | 36                         | 40                        | 44                          | 48                         |
| Control     | -5.00±1.40 <sup>aC</sup> | 19.33±0.57 <sup>aB</sup>  | 23.57±0.71 <sup>aAB</sup> | 22.70±6.83 <sup>aAB</sup> | 24.57±2.66 <sup>aAB</sup>  | 26.40±3.64 <sup>aA</sup>   | n.d.                       | n.d.                       | n.d.                       | n.d.                       | n.d.                      | n.d.                        | n.d.                       |
| 1           | -3.70±1.59 <sup>aD</sup> | 6.27±6.10 <sup>bC</sup>   | 11.87±1.91 <sup>bBC</sup> | 10.97±7.80 <sup>bC</sup>  | 18.90±0.95 <sup>aA</sup>   | 20.13±2.37 <sup>abA</sup>  | 20.60±1.76 <sup>aA</sup>   | 18.57±5.45 <sup>aA</sup>   | 17.80±3.08 <sup>aAB</sup>  | 20.00±1.44 <sup>aA</sup>   | 20.87±1.22 <sup>aA</sup>  | 23.13±1.16 <sup>aA</sup>    | 20.07±4.22 <sup>aA</sup>   |
| 2           | -6.23±1.20 <sup>aF</sup> | -2.43±4.15 <sup>cEF</sup> | 3.97±0.57 <sup>cE</sup>   | 13.90±3.50 <sup>bD</sup>  | 18.07±5.44 <sup>aBCD</sup> | 16.90±5.97 <sup>bcCD</sup> | 18.80±5.37 <sup>aBCD</sup> | 19.10±5.45 <sup>aBCD</sup> | 20.83±3.09 <sup>aBCD</sup> | 19.40±4.69 <sup>aBCD</sup> | 24.97±2.16 <sup>aAB</sup> | 26.77±1.15 <sup>aA</sup>    | 21.90±1.51 <sup>aABC</sup> |
| 3           | -4.97±1.04 <sup>aG</sup> | -0.60±3.44 <sup>cFG</sup> | 1.07±2.69 <sup>cFG</sup>  | 5.30±6.11 <sup>bEF</sup>  | 11.07±4.04 <sup>aDE</sup>  | 11.83±3.70 <sup>cD</sup>   | 18.47±4.75 <sup>aBCD</sup> | 15.97±3.14 <sup>aBCD</sup> | 14.47±2.67 <sup>aCD</sup>  | 23.30±2.15 <sup>aA</sup>   | 21.20±4.83 <sup>aAB</sup> | 17.03±2.86 <sup>aABCD</sup> | 20.67±1.08 <sup>aABC</sup> |
| 4           | -5.23±0.84 <sup>aF</sup> | -4.07±2.46 <sup>cF</sup>  | 2.73±1.69 <sup>cE</sup>   | 9.43±2.23 <sup>bD</sup>   | 16.27±4.88 <sup>aBC</sup>  | 13.73±3.71 <sup>bcCD</sup> | 15.77±3.56 <sup>aBC</sup>  | 18.97±6.62 <sup>aABC</sup> | 18.20±5.33 <sup>aABC</sup> | 17.47±1.70 <sup>aABC</sup> | 20.47±2.04 <sup>aAB</sup> | 23.00±0.61 <sup>aA</sup>    | 21.33±1.25 <sup>aAB</sup>  |
| 5           | -5.60±0.52 <sup>aC</sup> | -4.30±1.00 <sup>cC</sup>  | 3.57±0.96 <sup>cB</sup>   | 6.60±1.39 <sup>bB</sup>   | 19.50±1.44 <sup>aA</sup>   | 19.67±2.29 <sup>abA</sup>  | 19.47±0.49 <sup>aA</sup>   | 21.47±2.58 <sup>aA</sup>   | 19.00±1.84 <sup>aA</sup>   | 19.40±4.69 <sup>aA</sup>   | 20.77±1.02 <sup>aA</sup>  | 18.90±3.31 <sup>aA</sup>    | 21.83±1.48 <sup>aA</sup>   |
| 6           | -5.23±0.47 <sup>aE</sup> | -0.10±4.60 <sup>cDE</sup> | 3.53±5.09 <sup>cDE</sup>  | 7.77±5.65 <sup>bCD</sup>  | 16.00±2.21 <sup>aBC</sup>  | 16.07±2.31 <sup>bcBC</sup> | 18.37±1.66 <sup>aB</sup>   | 18.47±1.86 <sup>aB</sup>   | 18.27±3.55 <sup>aB</sup>   | 21.90±1.80 <sup>aAB</sup>  | 18.97±2.31 <sup>aB</sup>  | 31.27±17.13 <sup>aA</sup>   | 19.80±1.44 <sup>aB</sup>   |
| 7           | -5.87±2.05 <sup>aE</sup> | -5.60±1.65 <sup>cE</sup>  | 5.27±3.44 <sup>cD</sup>   | 8.13±6.42 <sup>bD</sup>   | 11.37±11.94 <sup>aCD</sup> | 12.20±5.06 <sup>cBCD</sup> | 19.10±5.37 <sup>aABC</sup> | 19.77±6.13 <sup>aABC</sup> | 18.90±5.65 <sup>aABC</sup> | 23.40±1.78 <sup>aA</sup>   | 21.57±1.82 <sup>aAB</sup> | 20.73±1.15 <sup>aABC</sup>  | 22.30±1.31 <sup>aA</sup>   |
| 8           | -5.80±0.60 <sup>aD</sup> | -3.37±3.44 <sup>cCD</sup> | 1.47±1.76 <sup>cBC</sup>  | 6.43±5.35 <sup>bB</sup>   | 16.57±4.27 <sup>aA</sup>   | 19.20±4.67 <sup>bcA</sup>  | 19.93±5.08 <sup>aA</sup>   | 20.60±3.50 <sup>aA</sup>   | 20.43±3.77 <sup>aA</sup>   | 22.03±1.96 <sup>aA</sup>   | 22.70±1.42 <sup>aA</sup>  | 18.07±1.40 <sup>aA</sup>    | 19.47±1.46 <sup>aA</sup>   |
| 9           | -5.40±2.16 <sup>aF</sup> | -4.10±2.05 <sup>cF</sup>  | 2.93±0.70 <sup>cE</sup>   | 7.87±0.76 <sup>bD</sup>   | 13.83±2.44 <sup>aC</sup>   | 13.83±2.69 <sup>bcC</sup>  | 14.80±0.80 <sup>aBC</sup>  | 16.70±4.96 <sup>aABC</sup> | 16.40±3.00 <sup>aABC</sup> | 19.43±4.21 <sup>aAB</sup>  | 19.57±3.29 <sup>aAB</sup> | 19.63±1.48 <sup>aAB</sup>   | 20.30±0.92 <sup>aA</sup>   |

<sup>a</sup> Values that do not bear the same lowercase letter(s) within a column and the same uppercase letter(s) within a row are significantly different ( $p < 0.05$ ). 1 (10 g L<sup>-1</sup> AS, 0 mL L<sup>-1</sup> EO, 5 g L<sup>-1</sup> BW), 2 (10 g L<sup>-1</sup> AS, 2.5 mL L<sup>-1</sup> EO, 5 g L<sup>-1</sup> BW), 3 (10 g L<sup>-1</sup> AS, 5 mL L<sup>-1</sup> EO, 5 g L<sup>-1</sup> BW), 4 (15 g L<sup>-1</sup> AS, 0 mL L<sup>-1</sup> EO, 5 g L<sup>-1</sup> BW), 5 (15 g L<sup>-1</sup> AS, 2.5 mL L<sup>-1</sup> EO, 5 g L<sup>-1</sup> BW), 6 (15 g L<sup>-1</sup> AS, 5 mL L<sup>-1</sup> EO, 5 g L<sup>-1</sup> BW), 7 (20 g L<sup>-1</sup> AS, 0 mL L<sup>-1</sup> EO, 5 g L<sup>-1</sup> BW), 8 (20 g L<sup>-1</sup> AS, 2.5 mL L<sup>-1</sup> EO, 5 g L<sup>-1</sup> BW), 9 (20 g L<sup>-1</sup> AS, 5 mL L<sup>-1</sup> EO, 5 g L<sup>-1</sup> BW); n.d., not determined.

**Table S3** Effect of edible coatings on the yellow intensity ( $b^*$ ) of tomatoes during storage <sup>a</sup>

| Formulation | Yellow intensity ( $b^*$ ) |                           |                             |                             |                             |                            |                             |                             |                             |                              |                            |                             |                            |
|-------------|----------------------------|---------------------------|-----------------------------|-----------------------------|-----------------------------|----------------------------|-----------------------------|-----------------------------|-----------------------------|------------------------------|----------------------------|-----------------------------|----------------------------|
|             | Number of Storage Days     |                           |                             |                             |                             |                            |                             |                             |                             |                              |                            |                             |                            |
|             | 0                          | 4                         | 8                           | 12                          | 16                          | 20                         | 24                          | 28                          | 32                          | 36                           | 40                         | 44                          | 48                         |
| Control     | 43.90±3.53 <sup>aB</sup>   | 52.43±2.50 <sup>aA</sup>  | 45.77±4.37 <sup>aAB</sup>   | 39.03±6.12 <sup>cB</sup>    | 45.73±4.65 <sup>aAB</sup>   | 53.37±3.84 <sup>aA</sup>   | n.d.                        | n.d.                        | n.d.                        | n.d.                         | n.d.                       | n.d.                        | n.d.                       |
| 1           | 42.37±1.59 <sup>aB</sup>   | 50.17±2.95 <sup>aAB</sup> | 53.93±3.69 <sup>aA</sup>    | 53.30±5.37 <sup>abA</sup>   | 47.60±6.12 <sup>aAB</sup>   | 53.27±6.70 <sup>aA</sup>   | 50.57±2.89 <sup>aAB</sup>   | 49.77±6.07 <sup>aAB</sup>   | 53.47±7.34 <sup>aA</sup>    | 49.43±1.05 <sup>cdAB</sup>   | 48.33±0.61 <sup>cAB</sup>  | 48.90±1.15 <sup>aAB</sup>   | 50.17±3.78 <sup>aAB</sup>  |
| 2           | 42.23±2.20 <sup>aE</sup>   | 46.87±3.70 <sup>aDE</sup> | 49.77±3.02 <sup>aABCD</sup> | 48.50±4.50 <sup>bBCD</sup>  | 51.77±1.76 <sup>aABCD</sup> | 53.30±1.39 <sup>aABC</sup> | 52.13±2.64 <sup>aABCD</sup> | 51.53±2.20 <sup>aABCD</sup> | 49.10±3.98 <sup>aABCD</sup> | 48.10±2.85 <sup>dCD</sup>    | 54.37±3.17 <sup>bA</sup>   | 52.43±2.38 <sup>aABCD</sup> | 54.17±3.36 <sup>aAB</sup>  |
| 3           | 40.90±0.56 <sup>aD</sup>   | 45.73±3.43 <sup>aCD</sup> | 50.20±7.31 <sup>aABC</sup>  | 51.93±3.97 <sup>abABC</sup> | 57.17±1.36 <sup>aAB</sup>   | 50.00±2.88 <sup>aBC</sup>  | 52.47±3.79 <sup>aABC</sup>  | 52.80±7.21 <sup>aABC</sup>  | 53.60±1.48 <sup>aAB</sup>   | 54.90±3.14 <sup>abcAB</sup>  | 52.70±0.62 <sup>bABC</sup> | 57.77±4.11 <sup>aA</sup>    | 50.30±0.95 <sup>aBC</sup>  |
| 4           | 40.83±3.18 <sup>aC</sup>   | 45.47±8.92 <sup>aBC</sup> | 48.93±7.81 <sup>aAB</sup>   | 55.80±6.41 <sup>abA</sup>   | 54.00±1.00 <sup>aAB</sup>   | 53.97±1.04 <sup>aAB</sup>  | 52.03±2.18 <sup>aAB</sup>   | 53.57±2.06 <sup>aAB</sup>   | 53.07±2.26 <sup>aAB</sup>   | 56.50±4.51 <sup>abA</sup>    | 53.03±1.46 <sup>bAB</sup>  | 50.37±1.65 <sup>aAB</sup>   | 51.33±4.70 <sup>aAB</sup>  |
| 5           | 40.37±2.71 <sup>aD</sup>   | 43.10±2.87 <sup>aD</sup>  | 43.07±2.18 <sup>aD</sup>    | 48.73±1.51 <sup>bC</sup>    | 51.43±2.40 <sup>aC</sup>    | 48.43±0.45 <sup>aC</sup>   | 51.47±3.14 <sup>aC</sup>    | 49.90±2.36 <sup>aC</sup>    | 49.73±3.01 <sup>aC</sup>    | 49.70±0.87 <sup>cdC</sup>    | 57.17±1.61 <sup>abA</sup>  | 55.60±1.67 <sup>aAB</sup>   | 52.57±1.46 <sup>aBC</sup>  |
| 6           | 41.20±1.55 <sup>aB</sup>   | 49.40±9.72 <sup>aAB</sup> | 49.60±8.44 <sup>aAB</sup>   | 51.40±2.95 <sup>abAB</sup>  | 55.13±4.63 <sup>aA</sup>    | 52.53±4.52 <sup>aAB</sup>  | 51.20±1.87 <sup>aAB</sup>   | 53.70±2.63 <sup>aAB</sup>   | 51.87±4.38 <sup>aAB</sup>   | 53.50±2.59 <sup>abcdAB</sup> | 59.37±2.68 <sup>aA</sup>   | 41.83±17.78 <sup>aB</sup>   | 53.87±4.11 <sup>aAB</sup>  |
| 7           | 43.60±2.65 <sup>aC</sup>   | 43.13±1.72 <sup>aC</sup>  | 46.93±2.85 <sup>aBC</sup>   | 48.50±3.06 <sup>bBC</sup>   | 49.73±12.04 <sup>aABC</sup> | 50.13±3.73 <sup>aABC</sup> | 53.60±1.32 <sup>aAB</sup>   | 53.50±3.30 <sup>aAB</sup>   | 54.33±2.03 <sup>aAB</sup>   | 53.47±1.97 <sup>abcdAB</sup> | 54.43±3.16 <sup>bAB</sup>  | 56.67±1.63 <sup>aA</sup>    | 54.77±1.53 <sup>aAB</sup>  |
| 8           | 41.87±2.31 <sup>aC</sup>   | 42.70±0.82 <sup>aC</sup>  | 50.97±3.71 <sup>aAB</sup>   | 55.97±2.92 <sup>abA</sup>   | 54.00±3.75 <sup>aA</sup>    | 54.60±5.81 <sup>aA</sup>   | 52.13±2.94 <sup>aA</sup>    | 52.93±3.15 <sup>aA</sup>    | 53.77±4.20 <sup>aA</sup>    | 50.93±1.96 <sup>bcdAB</sup>  | 45.87±1.80 <sup>cBC</sup>  | 51.93±3.70 <sup>aA</sup>    | 49.90±1.30 <sup>aAB</sup>  |
| 9           | 43.57±1.01 <sup>aD</sup>   | 46.07±2.89 <sup>aCD</sup> | 51.13±6.19 <sup>aBC</sup>   | 58.00±1.05 <sup>aAB</sup>   | 55.17±7.29 <sup>aAB</sup>   | 55.80±2.08 <sup>aAB</sup>  | 58.43±5.16 <sup>aAB</sup>   | 54.90±1.23 <sup>aAB</sup>   | 59.23±3.61 <sup>aA</sup>    | 58.60±5.91 <sup>aAB</sup>    | 53.93±4.40 <sup>bAB</sup>  | 50.80±2.45 <sup>aBC</sup>   | 51.77±1.62 <sup>aABC</sup> |

<sup>a</sup> Values that do not bear the same lowercase letter(s) within a column and the same uppercase letter(s) within a row are significantly different ( $p < 0.05$ ). 1 (10 g L<sup>-1</sup> AS, 0 mL L<sup>-1</sup> EO, 5 g L<sup>-1</sup> BW), 2 (10 g L<sup>-1</sup> AS, 2.5 mL L<sup>-1</sup> EO, 5 g L<sup>-1</sup> BW), 3 (10 g L<sup>-1</sup> AS, 5 mL L<sup>-1</sup> EO, 5 g L<sup>-1</sup> BW), 4 (15 g L<sup>-1</sup> AS, 0 mL L<sup>-1</sup> EO, 5 g L<sup>-1</sup> BW), 5 (15 g L<sup>-1</sup> AS, 2.5 mL L<sup>-1</sup> EO, 5 g L<sup>-1</sup> BW), 6 (15 g L<sup>-1</sup> AS, 5 mL L<sup>-1</sup> EO, 5 g L<sup>-1</sup> BW), 7 (20 g L<sup>-1</sup> AS, 0 mL L<sup>-1</sup> EO, 5 g L<sup>-1</sup> BW), 8 (20 g L<sup>-1</sup> AS, 2.5 mL L<sup>-1</sup> EO, 5 g L<sup>-1</sup> BW), 9 (20 g L<sup>-1</sup> AS, 5 mL L<sup>-1</sup> EO, 5 g L<sup>-1</sup> BW); n.d., not determined.

**Table S4** Effect of edible coatings on the total color difference ( $\Delta E$ ) of tomatoes during storage <sup>a</sup>

| Formulation | Total color difference ( $\Delta E$ ) |                           |                           |                           |                             |                             |                            |                            |                            |                            |                           |                            |                            |
|-------------|---------------------------------------|---------------------------|---------------------------|---------------------------|-----------------------------|-----------------------------|----------------------------|----------------------------|----------------------------|----------------------------|---------------------------|----------------------------|----------------------------|
|             | Number of Storage Days                |                           |                           |                           |                             |                             |                            |                            |                            |                            |                           |                            |                            |
|             | 0                                     | 4                         | 8                         | 12                        | 16                          | 20                          | 24                         | 28                         | 32                         | 36                         | 40                        | 44                         | 48                         |
| Control     | -                                     | 26.23±1.37 <sup>aA</sup>  | 30.35±1.82 <sup>aA</sup>  | 30.18±7.50 <sup>aA</sup>  | 30.98±4.05 <sup>aA</sup>    | 34.72±5.13 <sup>aA</sup>    | n.d.                       | n.d.                       | n.d.                       | n.d.                       | n.d.                      | n.d.                       | n.d.                       |
| 1           | -                                     | 13.78±2.77 <sup>bC</sup>  | 19.85±2.04 <sup>bB</sup>  | 19.98±4.85 <sup>bB</sup>  | 24.52±2.11 <sup>aAB</sup>   | 27.50±2.64 <sup>bcA</sup>   | 26.40±2.78 <sup>aA</sup>   | 24.79±4.53 <sup>aAB</sup>  | 25.57±1.07 <sup>aAB</sup>  | 25.06±2.86 <sup>aAB</sup>  | 26.06±2.73 <sup>aA</sup>  | 28.63±1.00 <sup>aA</sup>   | 26.69±4.43 <sup>aA</sup>   |
| 2           | -                                     | 7.22±4.21 <sup>bcE</sup>  | 13.53±2.15 <sup>bcE</sup> | 21.51±4.50 <sup>bD</sup>  | 26.83±4.43 <sup>aCD</sup>   | 26.07±5.60 <sup>bcCD</sup>  | 27.64±4.18 <sup>aBCD</sup> | 27.66±4.97 <sup>aBCD</sup> | 28.52±3.49 <sup>aBCD</sup> | 27.34±4.35 <sup>aBCD</sup> | 34.07±1.46 <sup>aAB</sup> | 35.34±1.14 <sup>aA</sup>   | 31.12±0.50 <sup>aABC</sup> |
| 3           | -                                     | 7.06±4.65 <sup>bcE</sup>  | 11.82±6.83 <sup>cDE</sup> | 15.36±5.95 <sup>bCD</sup> | 23.59±3.80 <sup>aABC</sup>  | 20.06±1.03 <sup>dBC</sup>   | 26.41±4.90 <sup>aAB</sup>  | 24.53±7.04 <sup>aAB</sup>  | 23.33±3.49 <sup>aABC</sup> | 32.12±1.99 <sup>aA</sup>   | 29.17±5.46 <sup>aA</sup>  | 27.99±3.31 <sup>aAB</sup>  | 27.88±2.09 <sup>aAB</sup>  |
| 4           | -                                     | 5.22±5.71 <sup>cD</sup>   | 11.65±4.65 <sup>cC</sup>  | 21.20±3.91 <sup>bB</sup>  | 25.72±3.37 <sup>aAB</sup>   | 23.48±1.92 <sup>cdAB</sup>  | 24.35±2.92 <sup>aAB</sup>  | 27.93±4.45 <sup>aAB</sup>  | 27.31±2.89 <sup>aAB</sup>  | 28.27±3.10 <sup>aA</sup>   | 28.70±2.89 <sup>aA</sup>  | 30.45±1.31 <sup>aA</sup>   | 29.41±4.15 <sup>aA</sup>   |
| 5           | -                                     | 4.00±3.02 <sup>cD</sup>   | 10.43±0.92 <sup>cC</sup>  | 15.63±0.84 <sup>bB</sup>  | 27.83±1.77 <sup>aA</sup>    | 27.16±1.97 <sup>bcA</sup>   | 27.70±1.45 <sup>aA</sup>   | 29.20±2.84 <sup>aA</sup>   | 27.17±2.45 <sup>aA</sup>   | 27.44±3.70 <sup>aA</sup>   | 31.43±1.21 <sup>aA</sup>  | 29.04±2.52 <sup>aA</sup>   | 30.30±1.91 <sup>aA</sup>   |
| 6           | -                                     | 10.67±8.03 <sup>bcD</sup> | 13.00±7.41 <sup>bcD</sup> | 17.54±2.80 <sup>bCD</sup> | 25.95±1.62 <sup>aBC</sup>   | 24.86±1.76 <sup>bcdBC</sup> | 25.93±2.29 <sup>aBC</sup>  | 26.98±1.68 <sup>aBC</sup>  | 26.60±3.38 <sup>aBC</sup>  | 30.23±0.38 <sup>aAB</sup>  | 30.40±1.16 <sup>aAB</sup> | 39.76±17.85 <sup>aA</sup>  | 28.43±1.30 <sup>aABC</sup> |
| 7           | -                                     | 5.25±0.82 <sup>cF</sup>   | 13.29±2.31 <sup>bcE</sup> | 16.14±7.07 <sup>bDE</sup> | 21.77±11.22 <sup>aBCD</sup> | 20.57±0.76 <sup>dCDE</sup>  | 27.38±2.35 <sup>aABC</sup> | 28.24±2.40 <sup>aABC</sup> | 27.58±2.28 <sup>aABC</sup> | 31.05±0.77 <sup>aA</sup>   | 29.78±3.62 <sup>aAB</sup> | 29.70±1.55 <sup>aAB</sup>  | 30.45±3.46 <sup>aA</sup>   |
| 8           | -                                     | 4.63±2.18 <sup>cD</sup>   | 12.30±2.16 <sup>cC</sup>  | 19.29±4.43 <sup>bB</sup>  | 26.28±1.57 <sup>aA</sup>    | 29.24±0.81 <sup>bA</sup>    | 28.50±3.32 <sup>aA</sup>   | 29.38±2.19 <sup>aA</sup>   | 29.65±1.76 <sup>aA</sup>   | 29.89±2.01 <sup>aA</sup>   | 29.97±1.74 <sup>aA</sup>  | 26.39±1.63 <sup>aA</sup>   | 27.17±2.11 <sup>aA</sup>   |
| 9           | -                                     | 3.82±1.73 <sup>cF</sup>   | 12.31±2.85 <sup>cE</sup>  | 19.89±1.40 <sup>bD</sup>  | 22.87±3.91 <sup>aCD</sup>   | 22.88±1.55 <sup>cdCD</sup>  | 25.40±2.23 <sup>aBC</sup>  | 25.05±2.77 <sup>aBC</sup>  | 27.13±1.90 <sup>aABC</sup> | 29.75±1.57 <sup>aA</sup>   | 27.50±2.36 <sup>aAB</sup> | 26.23±1.08 <sup>aABC</sup> | 27.20±2.35 <sup>aABC</sup> |

<sup>a</sup> Values that do not bear the same lowercase letter(s) within a column and the same uppercase letter(s) within a row are significantly different ( $p < 0.05$ ). 1 (10 g L<sup>-1</sup> AS, 0 mL L<sup>-1</sup> EO, 5 g L<sup>-1</sup> BW), 2 (10 g L<sup>-1</sup> AS, 2.5 mL L<sup>-1</sup> EO, 5 g L<sup>-1</sup> BW), 3 (10 g L<sup>-1</sup> AS, 5 mL L<sup>-1</sup> EO, 5 g L<sup>-1</sup> BW), 4 (15 g L<sup>-1</sup> AS, 0 mL L<sup>-1</sup> EO, 5 g L<sup>-1</sup> BW), 5 (15 g L<sup>-1</sup> AS, 2.5 mL L<sup>-1</sup> EO, 5 g L<sup>-1</sup> BW), 6 (15 g L<sup>-1</sup> AS, 5 mL L<sup>-1</sup> EO, 5 g L<sup>-1</sup> BW), 7 (20 g L<sup>-1</sup> AS, 0 mL L<sup>-1</sup> EO, 5 g L<sup>-1</sup> BW), 8 (20 g L<sup>-1</sup> AS, 2.5 mL L<sup>-1</sup> EO, 5 g L<sup>-1</sup> BW), 9 (20 g L<sup>-1</sup> AS, 5 mL L<sup>-1</sup> EO, 5 g L<sup>-1</sup> BW); n.d., not determined.
